# Supplementary material for: FGFR2c Upregulation Contributes to Cancer-Associated Fibroblast Program Activation and to Enhanced Autophagy in Actinic Keratosis-Derived Dermal Fibroblasts: A Possible Role in Precancerous Cell/Stromal Cell Crosstalk
Source: MDPI journal article supplement (doi:10.3390/biology12030463), 2023-03-16
Supplement: s1 [file s1]

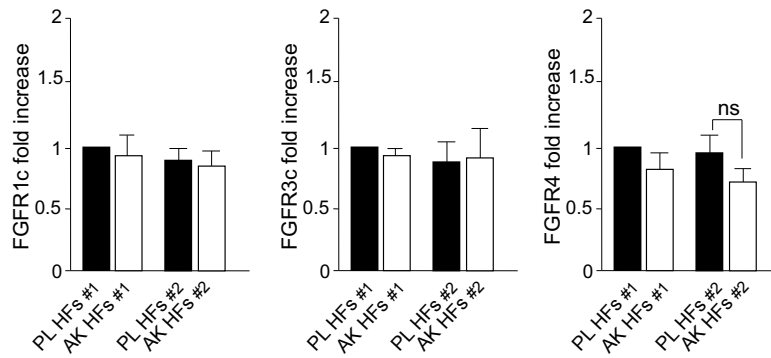

### Supplementary Figure S2

FGFR1c, FGFR3c and FGFR4 expression in #1-derived and #2-derived primary cultures of HFs.

Real time RT-PCR, performed in primary cultures of HFs from dermal portion of KIN I #1 and KIN I #2 samples using specific RNA primers, shows that all analyzed cells express comparable levels of FGFR1c, FGFR3c and FGFR4 mRNAs. Results are expressed as mean values  $\pm$  SD. The student's t test was performed, and significance levels are defined as  $p < 0.05$ . ns not significant.
