# Supplementary material for: FGFR2c Upregulation Contributes to Cancer-Associated Fibroblast Program Activation and to Enhanced Autophagy in Actinic Keratosis-Derived Dermal Fibroblasts: A Possible Role in Precancerous Cell/Stromal Cell Crosstalk
Source: MDPI journal article supplement (doi:10.3390/biology12030463), 2023-03-16
Supplement: s1 [file s1]

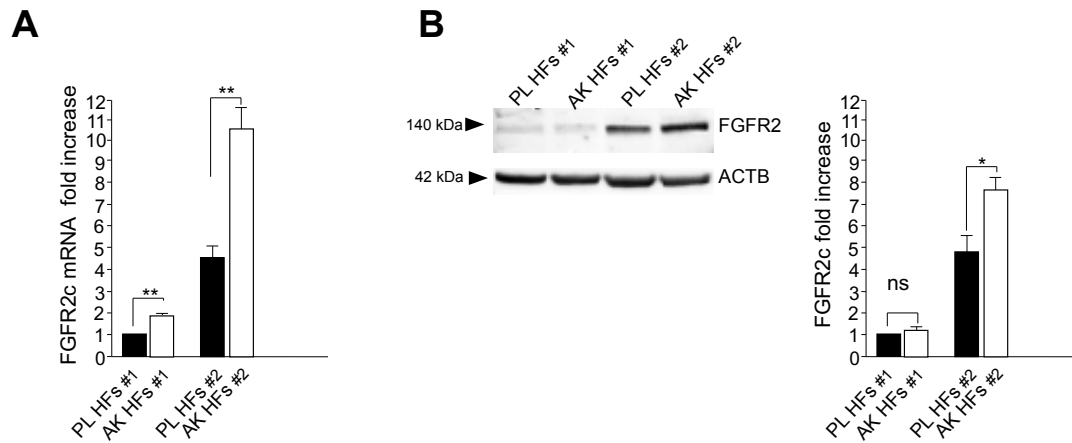

### Supplementary Figure S1

FGFR2c expression in #1-derived and #2-derived primary cultures of HF's. Primary cultures of HF's from dermal portion of KIN I #1 and KIN I #2 samples were selected for molecular and biochemical analysis of FGFR2 expression. A) Real time RT-PCR performed using FGFR2c specific RNA primers shows that #1AK and #1PL -derived cells express comparable and very low levels of FGFR2c specific mRNA, while #2-derived cultures expressed higher levels of this FGFR2 receptor variant mRNA, with and a significant increase in AK-derived cells. Results are expressed as mean values  $\pm$  SD. The student's t test was performed, and significance levels are defined as  $p < 0.05$ . \*\*  $p < 0.01$ . B) Western blot analysis shows a weak band at the molecular weight corresponding to FGFR2 visible in both PL and AK #1 cells, while a more consistent band is observed in #2 cultures, with a further increase in AK #2 cells. Equal loading was assessed with anti-ACTB. For densitometric analysis the values from three independent experiments were normalized, expressed as fold increases, and reported as mean values  $\pm$  SD. Student's t test was performed, and significance levels are defined as  $p < 0.05$ . \*  $p < 0.05$ ; ns not significant.
